# Supplementary material for: A thermogravimetric determination of dispersed and bulk-like barium species supported on γ-alumina
Source: Royal Society of Chemistry journal article supplement (doi:10.1039/b416144k), 2004-11-19
Supplement: b416144k.pdf [file b416144k.pdf]

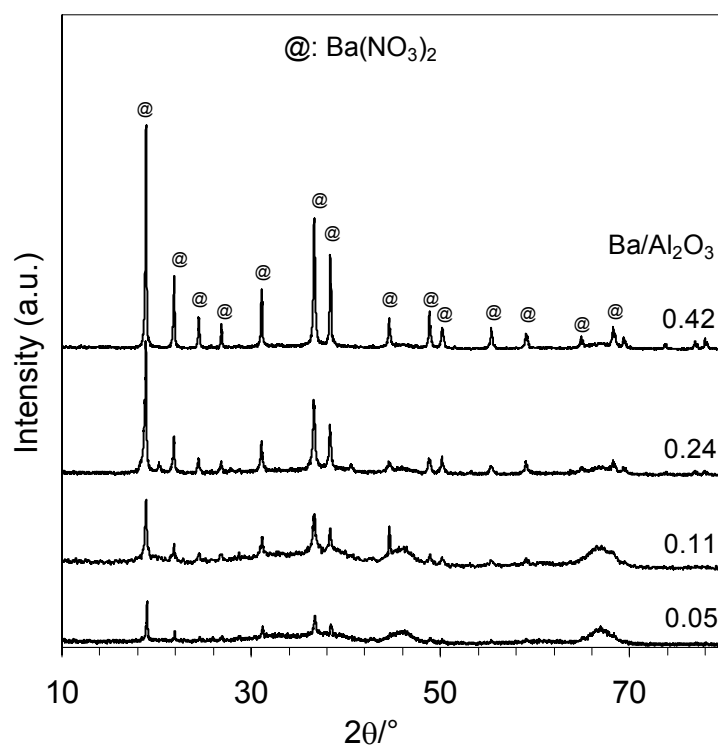

**S-Figure 1.** XRD patterns of  $\text{Ba}(\text{NO}_3)_2/\gamma\text{-Al}_2\text{O}_3$  with different  $\text{Ba}/\text{Al}_2\text{O}_3$  ratios.

### Nitrate or oxide aggregates on support

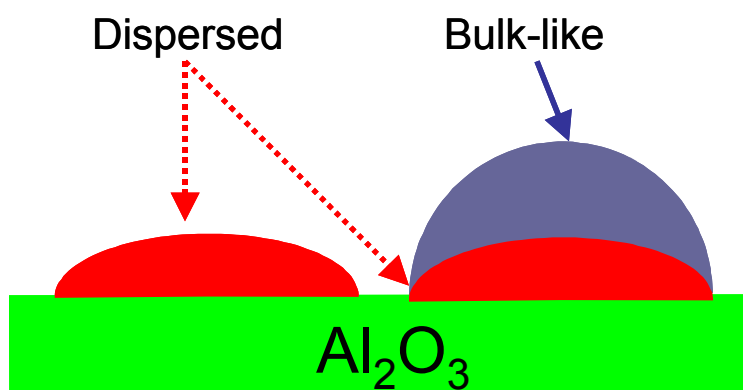

**S-Figure 2.** Schematic description of dispersed  $\text{Ba}(\text{NO}_3)_2$  or  $\text{BaO}$  (red) and bulk-like  $\text{Ba}(\text{NO}_3)_2$  or  $\text{BaO}$  (deep blue) loaded on support  $\gamma\text{-Al}_2\text{O}_3$ .  $\text{BaO}$  is obtained from decomposition of  $\text{Ba}(\text{NO}_3)_2$  on  $\gamma\text{-Al}_2\text{O}_3$ .

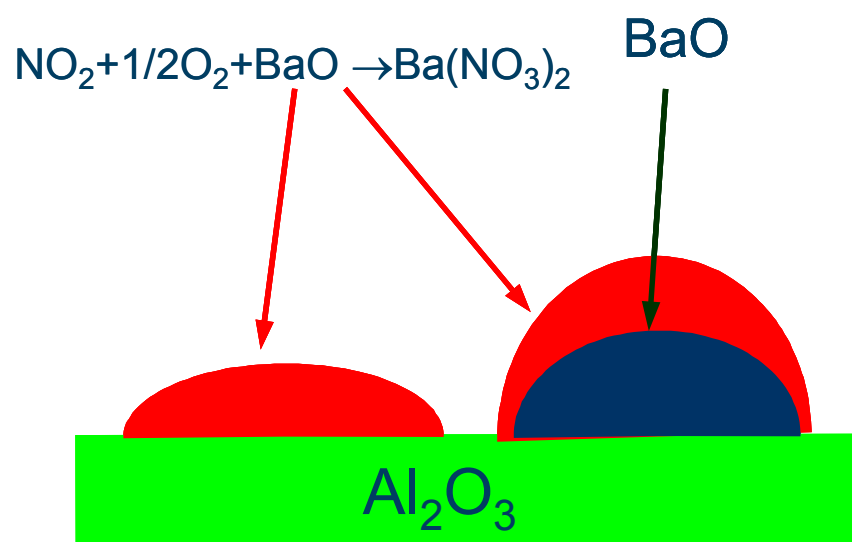

**S-Figure 3.** Schematic diagram of  $\text{NO}_2$  stored on  $\text{BaO}/\text{Al}_2\text{O}_3$  aggregates to show the role of dispersed  $\text{BaO}$  and bulk-like phases during  $\text{NO}_2$  chemisorption to form  $\text{Ba}(\text{NO}_3)_2$ .
